# Supplementary material
Source: PubMed Central journal article supplement (PMC6926034)
Supplement: pnas.1910695116.sapp.pdf [file pnas.1910695116.sapp.pdf]

1

## 2 **Supplementary Information for**

### 3 **Magnetoelastoresistance in $WTe_2$**

4 **Na Hyun Jo, Lin-Lin Wang, Peter P. Orth, Sergey L. Bud'ko and Paul C. Canfield**

5 **Na Hyun Jo.**

6 **E-mail: [njo@iastate.edu](mailto:njo@iastate.edu),**

7 **Paul C. Canfield.**

8 **E-mail: [canfield@ameslab.gov](mailto:canfield@ameslab.gov)**

#### 9 **This PDF file includes:**

10     Supplementary text

11     Figs. S1 to S10

12     Table S1

13     References for SI reference citations

## 14 Supporting Information Text

### 15 1. Elastoresistance tensor and Gauge factor

16 The elastoresistance of a material characterizes the changes of the resistance of the material due to the stress experienced by  
17 the material. Based on the definition of resistance,  $R = \rho \frac{L}{A}$ , changes in the resistance can be written as

$$18 \quad \frac{dR}{R} = \frac{d\rho}{\rho} + \frac{dL}{L} - \frac{dA}{A}. \quad [1]$$

19 The first term is the change in the resistivity of the material which relates to the electronic properties of the material. The  
20 second and the third terms are purely geometrical factors. For typical metals, such as Cu, these geometric terms dominate  
21 elastoresistance. However, strain dependent changes in density of states, mobility, scattering, etc. (elastoresistivity) play  
22 important roles in cases like WTe<sub>2</sub>.

23 The elastoresistivity is described by

$$24 \quad \left(\frac{d\rho}{\rho}\right)_i = \sum_{k=1}^6 m_{ik} \varepsilon_k \quad [2]$$

25 where  $m_{ik}$  is the elastoresistive strain matrix and  $\varepsilon_k$  is the strain tensor in Voigt notation. (1) For an orthorhombic structure,  
26 there are nine independent terms in the elastoresistivity tensor: (2)

$$27 \quad \begin{pmatrix} m_{11} & m_{12} & m_{13} & 0 & 0 & 0 \\ m_{12} & m_{22} & m_{23} & 0 & 0 & 0 \\ m_{13} & m_{23} & m_{33} & 0 & 0 & 0 \\ 0 & 0 & 0 & m_{44} & 0 & 0 \\ 0 & 0 & 0 & 0 & m_{55} & 0 \\ 0 & 0 & 0 & 0 & 0 & m_{66} \end{pmatrix}. \quad [3]$$

28 Considering our measurement configuration, the stress was applied only along the crystallographic  $a$  direction, the stress is

$$29 \quad \tau = (\tau_{xx}, \tau_{yy}, \tau_{zz}, \tau_{yz}, \tau_{zx}, \tau_{xy}) = (\tau_{xx}, 0, 0, 0, 0, 0). \quad [4]$$

30 Since the strain  $\varepsilon$  can be expressed in terms of the elastic compliance  $S$  and the stress  $\tau$ ,

$$31 \quad \varepsilon_k = \sum_{l=1}^6 S_{kl} \tau_l, \quad [5]$$

32 the strain therefore is:

$$33 \quad \varepsilon = (\varepsilon_{xx}, \varepsilon_{yy}, \varepsilon_{zz}, 0, 0, 0). \quad [6]$$

34 If we neglect geometric factors, the change in resistance of the crystal is given by

$$35 \quad \left(\frac{dR}{R}\right)_{xx} = m_{11}\varepsilon_{xx} + m_{12}\varepsilon_{yy} + m_{13}\varepsilon_{zz} \quad [7]$$

36 The strain terms in the  $y$  and  $z$  directions are determined by the Poisson's ratio of the crystal,  $\nu_{xy}$  and  $\nu_{xz}$ .

$$37 \quad \left(\frac{dR}{R}\right)_{xx} = \varepsilon_{xx}(m_{11} + \nu_{xy}m_{12} + \nu_{xz}m_{13}). \quad [8]$$

38 The Gauge factor (GF) can also be obtained from Eq. (1):

$$39 \quad GF = \left(\frac{dR/R}{\varepsilon_{xx}}\right)_{xx} = \frac{(d\rho/\rho)_{xx}}{\varepsilon_{xx}} + (1 + 2\nu). \quad [9]$$

40 The GF of ordinary metals, like copper, is a temperature independent value with magnitude around 2. This is because  
41 geometric factor is the dominant term and Poisson's ratio for the most of metals is  $0.3 < \nu < 0.5$ . (3) A recent paper on  
42 WTe<sub>2</sub> calculated the Poisson's ratio  $\nu$  of the material as  $\nu \sim 0.16$ . (4, 5) Since we obtained GFs much larger than 2, and,  
43 at times, with negative signs, for WTe<sub>2</sub>, changes in the electronic properties rather than geometry, are dominant. Therefore,  
44 measurements of elastoresistivity (and its response to magnetic field) offer new insight into the electronic properties of WTe<sub>2</sub>.

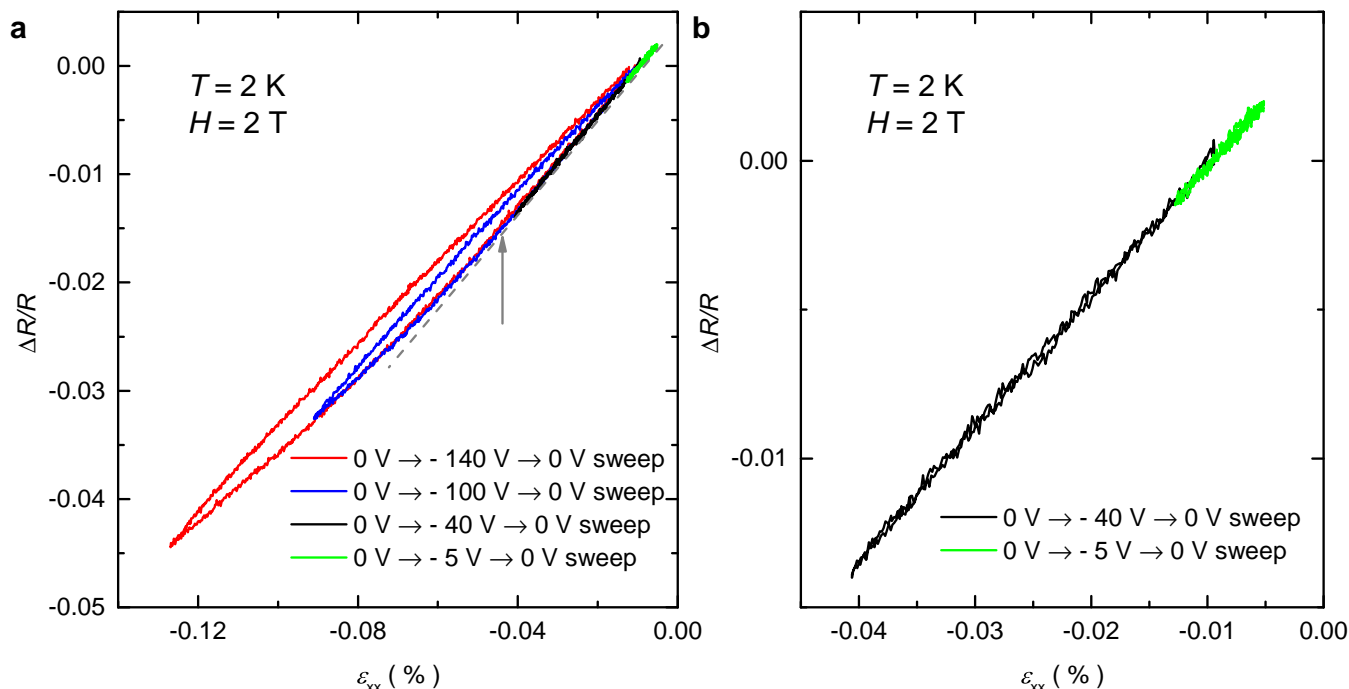

**Fig. S1. a, Resistance response to the strain with various voltage limits** Strain( $\epsilon_{xx}$ ) sweep at fixed temperature of  $T = 2$  K and the magnetic field  $H = 2$  T with various voltage limits; -5 V (green line), -40 V (black line), -100 V (blue line) and -140 V (red line). The green dashed line is a guide line to point out the deviation from linear behavior, which also indicated with the gray arrow. **b, 0 V  $\rightarrow$  -5 V  $\rightarrow$  0 V, and 0 V  $\rightarrow$  -40 V  $\rightarrow$  0 V sweeps on an expanded scale.**

## 2. Methods

Single crystals of  $\text{WTe}_2$  were grown out of a Te-rich, binary melt, following the procedure described in Ref. (6). Temperature and field dependent transport properties were measured in a Quantum Design(QD), Physical Property Measurement System for  $1.8 \leq T \leq 300$  K and  $|H| \leq 140$  kOe. Resistance measurements under uniaxial stress were carried out using a Razorbill CS100 cryogenic uniaxial stress cell. To be more specific, outer and inner piezoelectric stacks were controlled by two Keithley Model 2400 source meters, and corresponding length changes of the crystals were measured by a capacitance sensor using an Andeen-Hagerling(AH) Model 2550A capacitance bridge. Note that there is always certain errors in the length change measurements due to thermal contraction of various parts. Although some thermal effects were addressed (i.e. the thermal effect from piezoelectric materials was canceled via symmetric usage of outer and inner piezoelectric stacks and the thermal effect from the capacitance sensor was removed by subtracting the temperature dependence capacitance of the empty cell result), others, including the thermal contraction from the cell and the crystal itself, were not considered. The crystals were mounted across the two plates with Stycast 2850 FT, so that the crystal was mechanically attached to the plates firmly and electrically isolated from the cell body.(Fig.1 a) We estimated that, due to the epoxy, about 80 % of the displacement was transmitted as sample strain. In this calculation, we used the Young's modulus of the crystals of 80 GPa and the thickness of the glue was  $\sim 50 \mu\text{m}$ . (5, 7) The contacts for the electrical transport measurement were prepared in a standard linear four-probe configuration using Epotek-H20E silver epoxy and silver paint, and Lakeshore Model 370 AC resistance bridge was used for the resistance measurement of the crystals. Due to the large drop in the resistivity of  $\text{WTe}_2$  upon cooling in zero field, combined with the limit of the resistance bridge (resolution is  $1 \mu\Omega$  with  $I = 3.16$  mA in the range of  $2.0$  m $\Omega$ ), we were not able to conduct the elastoresistance measurements below  $T < 50$  K with  $H = 0$  T in the above experimental setting. In order to overcome this limit of the measurement, we performed the elastoresistance experiment without the magnetic field using Stanford Research Systems(SRS) 860, Lock-In Amplifier and SRS Model CS580, voltage controlled current source in a Janis SHI-950-T closed cycle cryostat. Two samples were measured in this way, S3' and S4. S3' is essentially same as S3, which was measured in PPMS, but new contacts were made after cleaving the top layer. S4 was mounted in a Razorbill CS130 cryogenic uniaxial stress cell. S4 was secured with a small amount of Devcon 5 minute epoxy in between anodized plates, which can give the largest transmitted strain on the sample.

As we applied uniaxial stress along the crystallographic  $a$  axis, three strain tensor components are non-zero in Voigt notation. (see SI) However, we measured only one component,  $\epsilon_{xx}$ , due to the experimental set up. In this paper, we define strain as  $\epsilon_{xx} [\%] = [(L - L_0)/L_0] \times 100$ , where  $L_0$  is the unstrained length. Thus, a positive sign represents tensile strain and a negative sign stands for compressive strain. We noticed that the crystals are very easy to break when even a small amount of tensile strain is applied. The compressive strain at which the sample starts to buckle can be calculated based on the ratio between length and thickness ( $L/t$ ) of the crystals:  $L/t = \pi/\sqrt{3\epsilon_{xx}}$ . (8) From the calculation, we expected buckling of all three samples that we measured above  $\epsilon_{xx} = -1.5\%$ . However, the first sample of  $\text{WTe}_2$ , S1, cleaved at  $\epsilon_{xx} \sim -0.3\%$ , which was before

77 the sample started to buckle due to the easily exfoliable nature of the crystal. In addition, the second crystal, S2, showed a  
 78 jump at  $\varepsilon_{xx} \sim -0.16\%$  without visual observation of a cleave or crack in the sample. This might indicate that cracks or  
 79 small cleaving can happen even with small strain due to the layered structure. Based on all of the above, elastoresistance  
 80 measurements were done only  $\varepsilon_{xx} \leq \pm 0.013\%$  which corresponds to a maximum voltage applied to the piezoelectric material  
 81 of  $V = \pm 5$  V for the third single crystals of  $\text{WTe}_2$ , S3. Within this range, resistance response to the strain ( $\Delta R/R$  vs. strain)  
 82 was linear without hysteresis (more details are in SI). Details about Shubnikov de Haas oscillations can be found in SI.

83 Band structures of  $\text{WTe}_2$  at strains from 0 to  $-0.2\%$  were calculated in density functional theory (9, 10) (DFT) using  
 84 local density approximation (11, 12) (LDA) with spin-orbit coupling (SOC) effect included. The dimensions of the unit cells  
 85 were determined from experimental lattice constants (13) ( $a = 3.477 \text{ \AA}$ ,  $b = 6.249 \text{ \AA}$  and  $c = 14.018 \text{ \AA}$ ) plus strain and a Poisson  
 86 ratio (4) of 0.16. The ionic positions in the unit cells were relaxed at different strains and then band structures are calculated.  
 87 The band structure with relaxed ionic positions at this strain range is insensitive to the out-of-plane strain because of the  
 88 weak vdW interaction and large spacing between the stacking layers along  $c$ -axis. The carrier densities were calculated from  
 89 the volume of electron and hole pockets in reciprocal space. The quantum oscillation frequencies were calculated by finding  
 90 the extreme orbit (14) of hole and electron pockets with the magnetic field along the  $c$  direction. The conductivity without  
 91 magnetic field were calculated from the semi-classical Boltzmann equation with the interpolated DFT band structures. (15)  
 92 DFT calculations were done in VASP (16) with a plane-wave basis set and projector augmented wave (17) method. We used  
 93 the orthorhombic cell of 12 atoms with a  $\Gamma$ -centered Monkhorst-Pack (18) ( $12 \times 6 \times 3$ )  $k$ -point mesh. The kinetic energy cutoff  
 94 was 223 eV. The convergence with respect to  $k$ -point mesh was carefully checked, with total energy converged, e.g., well below  
 95 1 meV/atom. For ionic relaxation, the absolute magnitude of force on each atom was reduced below 0.01 eV  $\text{\AA}$ .

### 96 3. Elastoresistance experiment

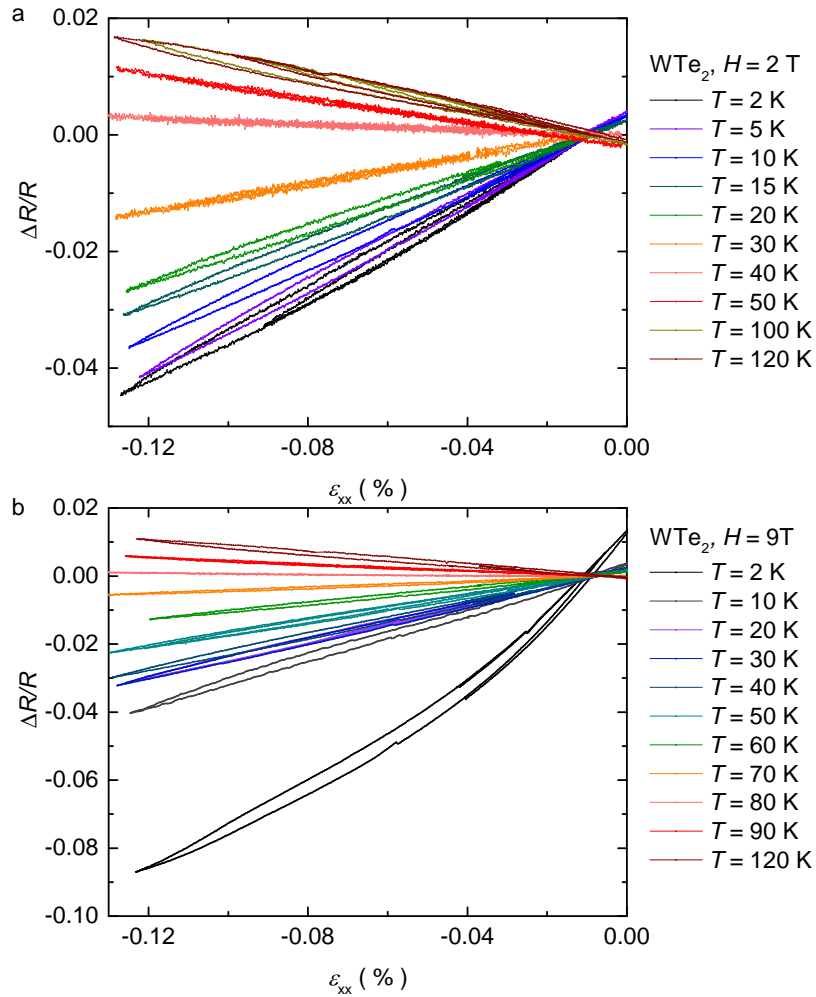

**Fig. S2. Resistance response to the strain with various temperatures** a, Strain( $\varepsilon_{xx}$ ) sweeps in the magnetic field of 2 T. b, Strain( $\varepsilon_{xx}$ ) sweeps in the magnetic field of 9 T. Note: clear non-linearity in 2 K data is likely associated with strain induced changes in Quantum oscillation (QO) frequencies and QO in Magneto-elastoresistance (MER) is discussed below.

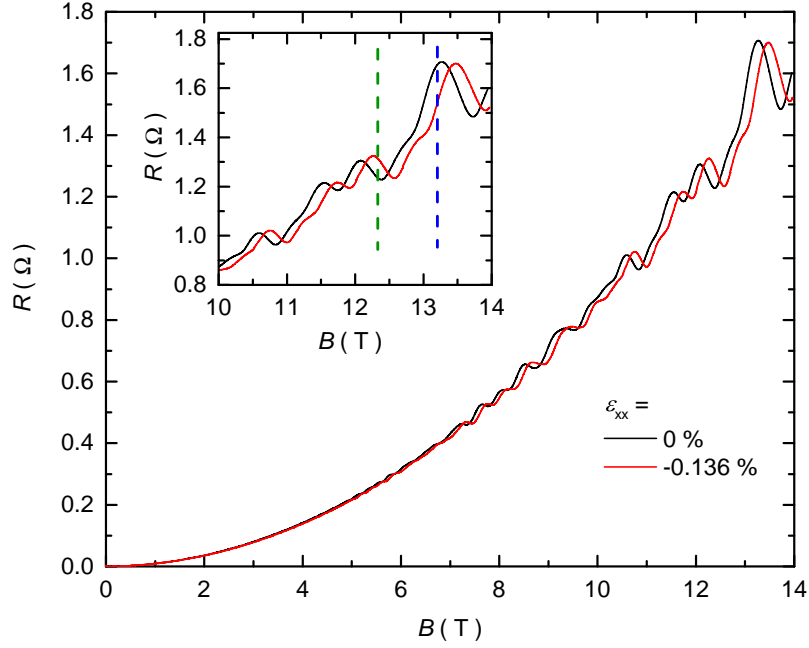

**Fig. S3. Large changes in elastoresistance** Magnetoconductance data without (black line,  $\varepsilon_{xx} = 0\%$ ) strain and with (red line,  $\varepsilon_{xx} = -0.136\%$ ) strain at  $T = 2\text{ K}$ . Inset shows magnetoconductances from 10 T to 14 T on an enlarged scale.

97 We took care to measure our data in the linear response limit. To do this we measured  $\Delta R/R$ , where  $\Delta R = R(\varepsilon_{xx}) - R(\varepsilon_{xx} =$   
 98  $0)$ , versus strain loops for a variety of strain (or voltage) sweeps at base temperature (Fig. S1) as well as over the whole  
 99 temperature range (Fig. S2). We find that as we increase the size of strain sweeps there is an increasing hysteresis. As a result  
 100 of these measurements and out of an abundance of caution, we limit our measurements of ER to a maximum voltage applied to  
 101 the piezoelectric material of  $V = \pm 5\text{ V}$ , which correspond to  $|\varepsilon_{xx}| \leq 0.013\%$  for sample S3, so as to be in the linear regime  
 102 (See Fig. S1). On the other hand, quantum oscillation analyses with applied strain were limited to  $|\varepsilon_{xx}| \leq 0.136\%$ . In this  
 103 range, the shift in quantum oscillations frequency is linear as shown in Fig. 3 e, although there was hysteresis in the  $\Delta R/R$   
 104 versus strain data. We also performed experiments on various samples to check reproducibility. S1 was the first sample, that  
 105 was cleaved due to applying too much strain. Here, ER was unreproducible with a non-linear big hysteresis. S2 was the second  
 106 sample that we show in the manuscript. The same experiments on the third sample, S3, were performed to confirm the result  
 107 from S2. S3' is basically same as S3, but the a few top layers were cleaved to redo the electrical contacts. The experiments on  
 108 S4 were conducted to check the low temperature data in zero the magnetic field on S3'.

#### 109 4. Large changes in elastoresistance due to quantum oscillations

110 Figure S3 shows the low-temperature magnetoconductance (MR) without strain ( $\varepsilon_{xx} = 0$ ) and with a strain of  $\varepsilon_{xx} = -0.136\%$  at  
 111  $T = 2\text{ K}$ . Whereas the MR increases quadratically without saturation up to 14 T, quantum oscillations are detected above  
 112  $\sim 4\text{ T}$  in both cases. Due to the strain induced changes in frequencies, there are mismatches in the quantum oscillation peaks  
 113 in the high magnetic field regime. Therefore, the elastoresistance (ER) change dramatically from negative to positive with  
 114 small changes of the magnetic field. To illustrate this more clearly, we focus on MR from 10 T to 14 T in the inset of Fig. S3.  
 115 The vertical green dashed line indicates a negative ER whereas the blue dashed line indicates a positive ER.

116 Subtracting the MR without strain from MR with strain allows us to directly examine the oscillations in the magneto-  
 117 elastoresistance (MER). This is shown in Fig. S4a and c. In order to corroborate these as quantum oscillations, we perform a  
 118 fast Fourier transform (FFT) on the data as a function of  $1/B$ . Figure S4b and d are the results of FFT on S2 and S3. All four  
 119 frequencies, that were detected from SdH measurements, are observed in both samples. As such, these data, as well as the data  
 120 highlighted in the inset of Fig. 2a and b, are clear manifestations of quantum oscillations in MER.

121 To further investigate these MER quantum oscillations, we use Lifshitz and Kosevich theory to arrive at

$$122 \quad \Delta_\varepsilon R = \sum_i A_i(B, T) \left[ \sin \left( \frac{2\pi[F_i + \delta F_i(\varepsilon_{xx})]}{B} + \phi_i \right) - \sin \left( \frac{2\pi F_i}{B} + \phi_i \right) \right], \quad [10]$$

123 where  $\Delta_\varepsilon R \equiv R(\varepsilon_{xx} \neq 0) - R(\varepsilon_{xx} = 0)$  and  $\delta F_i(\varepsilon_{xx})$  denotes the shift of frequencies due to strain. As noted above, this shift  
 124 is due to a strain-induced change of the bandstructure, resulting in a change of the size of the extremal orbit. Note that  
 125 in Eq. (10) we have neglected the change of the quadratic background part of MR under strain, which is subleading. We also  
 126 assume that  $\phi_i$  and  $A_i$  are independent of strain.

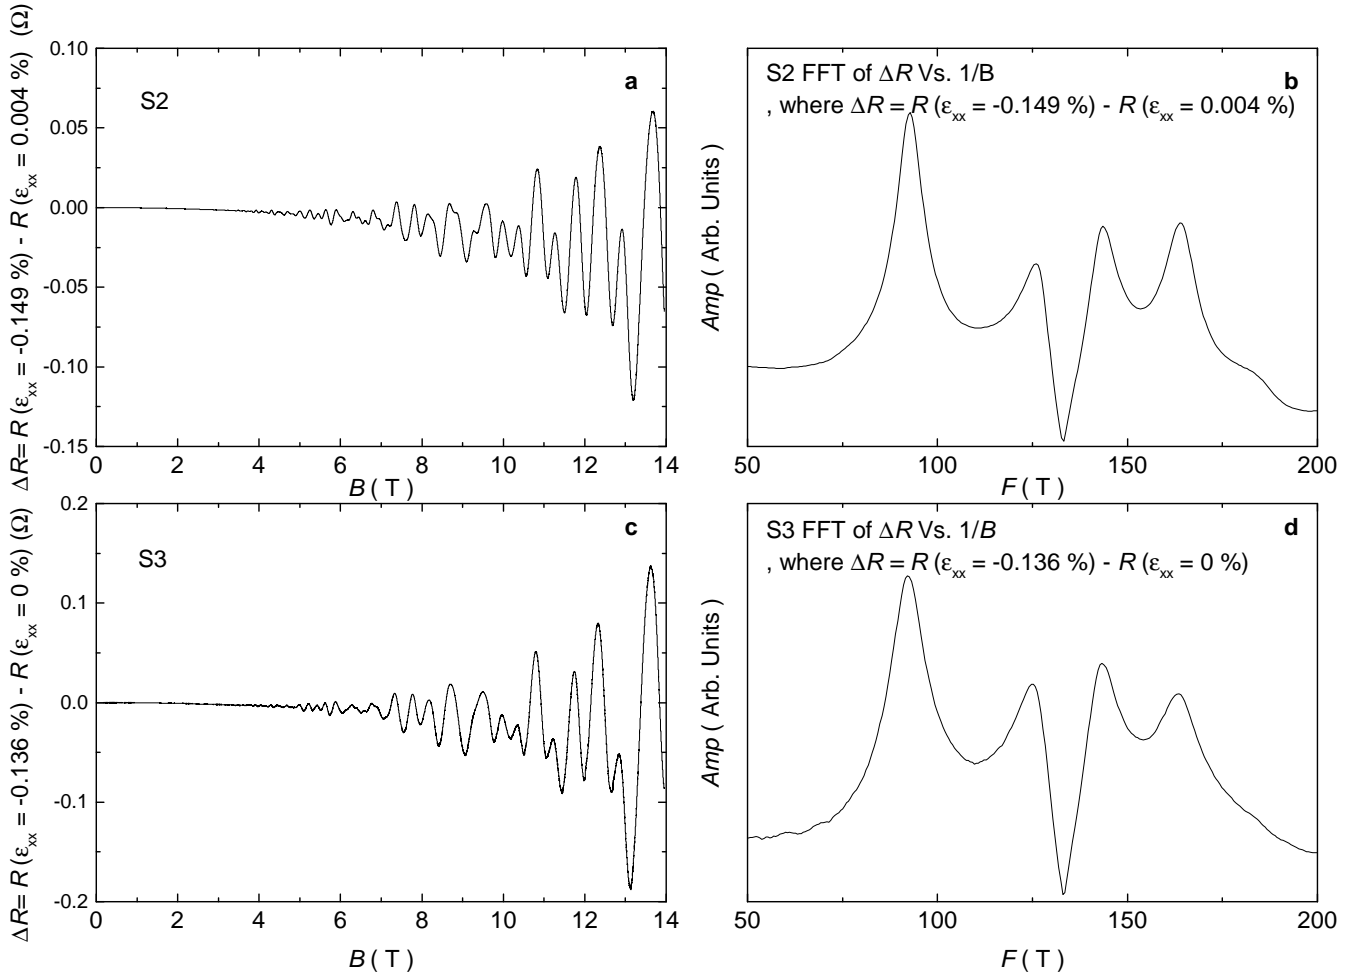

**Fig. S4. QO in MER** **a**,  $\Delta R = R(\varepsilon_{xx} = -0.149\%) - R(\varepsilon_{xx} = 0.004\%)$  as a function of the magnetic field in S2. **b**, FFT of  $\Delta R$  in terms of  $1/B$  in S2. **c**,  $\Delta R = R(\varepsilon_{xx} = -0.136\%) - R(\varepsilon_{xx} = 0\%)$  as a function of the magnetic field in S3. **d**, FFT of  $\Delta R$  in terms of  $1/B$  in S3.

127 For small strain one finds  $\delta F/F \propto \varepsilon_{xx} \ll 1$  such that Eq. (10) becomes

$$128 \quad \Delta_\varepsilon R = \sum_i A_i(B, T) \cos\left(\frac{2\pi F_i}{B} + \phi_i\right) \frac{2\pi \delta F_i(\varepsilon_{xx})}{B}. \quad [11]$$

129 The important conclusion is that the frequencies of the MER oscillations in  $\Delta_\varepsilon R$  are identical to the frequencies observed in  
130 SdH oscillations of the MR.

## 131 5. Quantum oscillation analysis

132 When using a fast Fourier transformation (FFT) to determine the frequencies of the quantum oscillations, the frequency  
133 resolution is generally determined by the size of the Fourier window. Figure S5 highlights the data spacing around the local  
134 maximum which defines  $F^1$ ; the data points are more closely spaced for wider field range windows. In order to resolve  
135 the strain dependence of frequency changes in WTe<sub>2</sub>, within a relatively small strain range, the magnetic field range of  
136  $0.5 \text{ T} < H < 13.95 \text{ T}$  was used for all strains. In order to check the reproducibility of these results, we performed similar  
137 experiments and analysis on sample S3 with a fewer number of strains. As shown in Fig. S6a and b, S3 also shows similar  
138 behavior as S2 (Fig. 3).

139 Although the resolution is important to resolve the peaks, one is also interested in analyzing the amplitude of the peaks to  
140 obtain the associated effective masses. In this case, it is important to choose a magnetic field range that starts at the field  
141 strength where the MR begins to show quantum oscillations at the highest temperature. To be more specific, the amplitude of  
142 peaks can be reduced due to an artifact of the FFT analysis which comes from including low magnetic field MR data into the  
143 Fourier window, where MR does not exhibit quantum oscillations at higher temperatures. In addition, quantum oscillations at  
144 higher temperatures require higher magnetic fields to start. Thus, one needs to determine the magnetic field range based on  
145 the highest temperature data that will be used for the analysis. Taking this into account we used a magnetic field range of  
146  $5 \text{ T} < H < 13.95 \text{ T}$  to infer the amplitude changes as a function of the temperature with different strains.

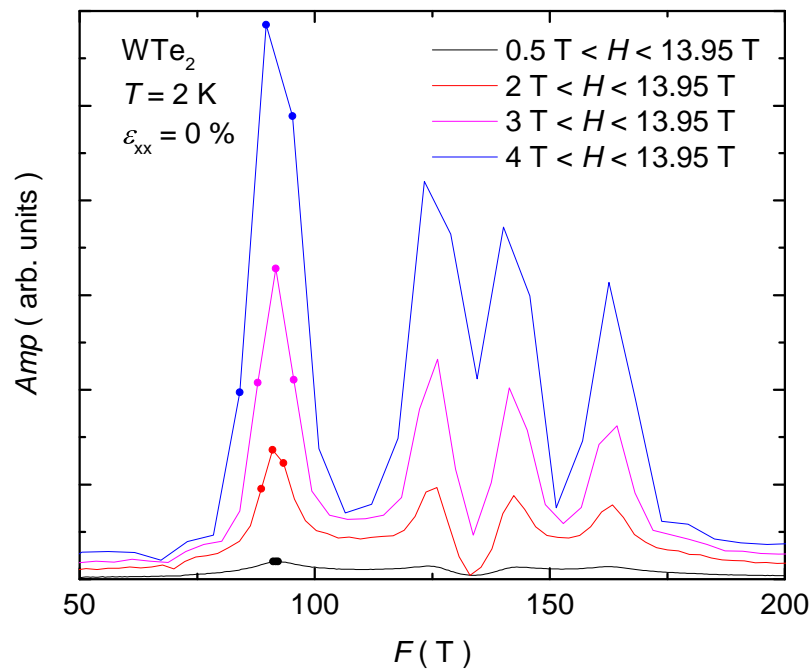

**Fig. S5. Resolution of frequencies** FFT results of WTe<sub>2</sub> at  $T = 2 \text{ K}$  and  $\varepsilon_{xx} = 0 \%$  for various magnetic field ranges. The filled circles are the data point at  $F^1$  and the nearest data points around the  $F^1$ .

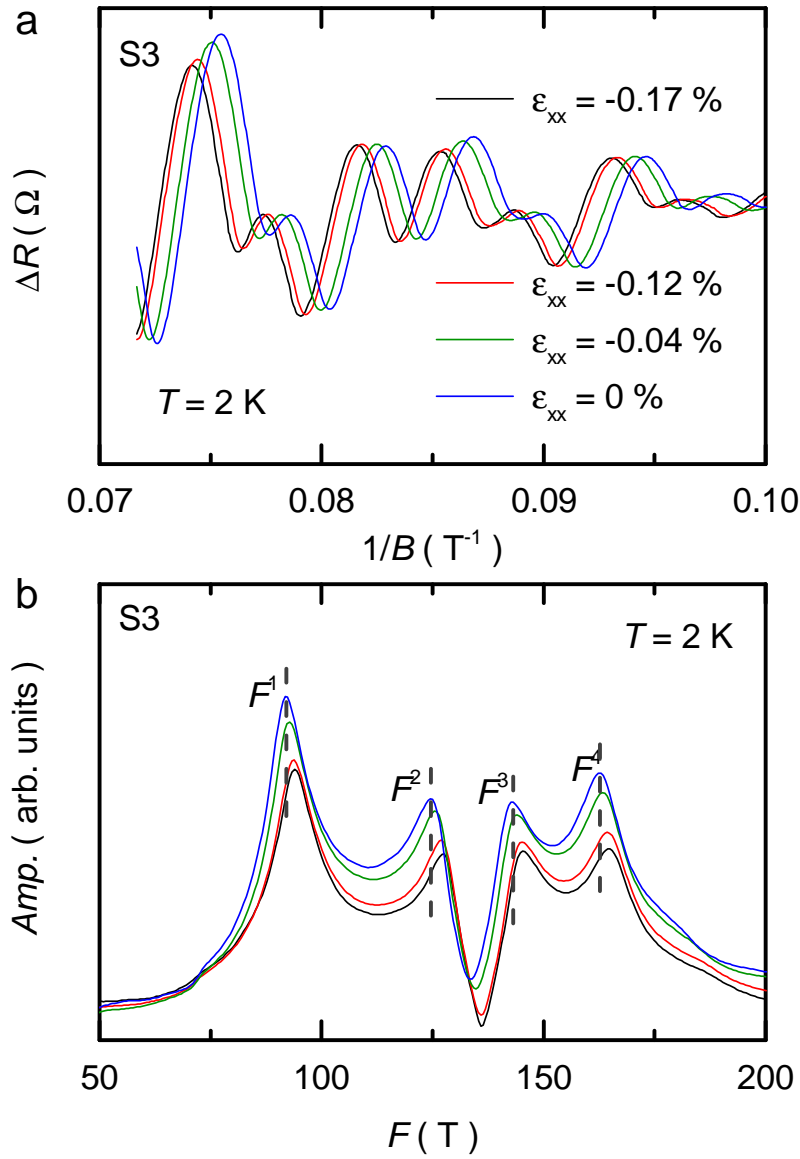

**Fig. S6. Confirmation of the frequency changes with strain** a, SdH oscillations at various strains for S3. b, FFT results at various strains, and gray dashed lines are the position of the local maximum for  $\epsilon_{xx} = 0\%$  and serve as guide lines for the shifting of the frequencies.



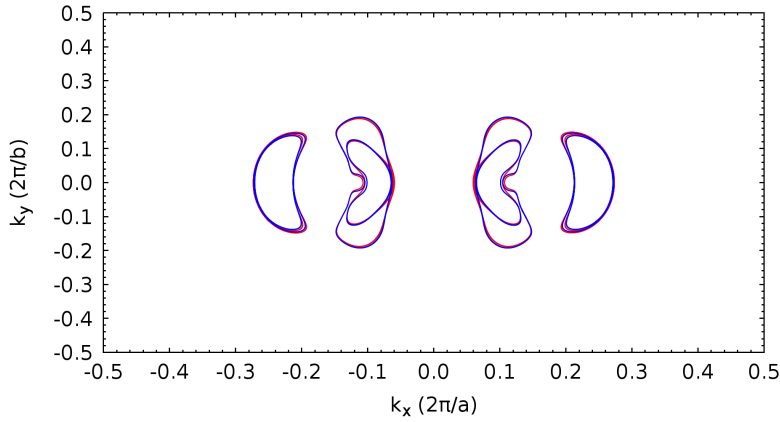

Fig. S7. DFT calculation of Fermi surface Full Brillouin zone Fermi surface calculation results from DFT for strain ( $\epsilon_{xx}$ ) at 0 (blue line) and -0.2% (red line).

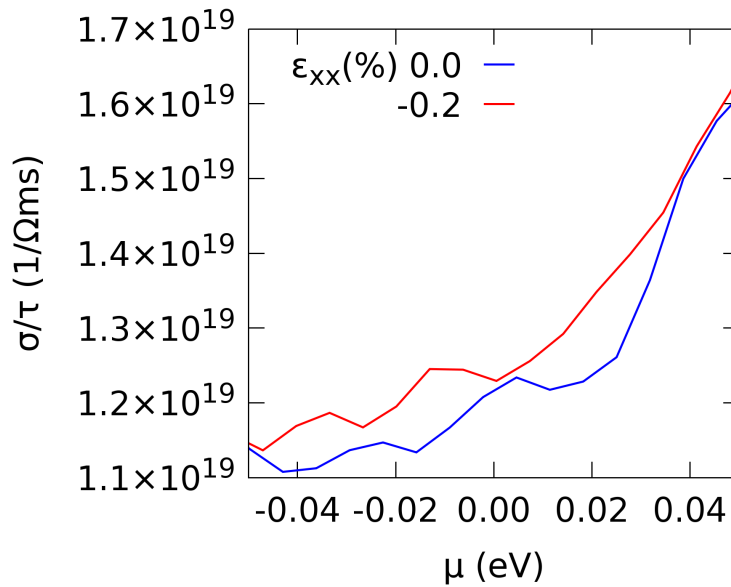

Fig. S8. DFT calculation of Conductivity as a function of chemical potential Conductivity over relaxation time ( $\sigma/\tau$ ) vs. electronic chemical potential ( $\mu$ ) as calculated from semi-classical Boltzmann model with DFT band structure for strain ( $\epsilon_{xx}$ ) at 0 (blue line) and -0.2% (red line).

## 147 6. Full Brillouin zone from density functional theory (DFT) calculations

## 148 7. Electrical conductivity from DFT calculations

149 The conductivity is calculated from the semi-classical Boltzmann equation with the interpolated DFT band structures at  
 150  $T = 0$  K (15). The ratio of conductivity and relaxation time  $\sigma/\tau$  without and with applied strain  $\epsilon_{xx} = -0.2\%$  is plotted as a  
 151 function of chemical potential in Fig. S8. We find a positive elastoresistance (ER), i.e., for negative strain the conductivity goes  
 152 up, within the chemical potential range of  $-0.04 < \mu < 0.04$  eV. This is an additional indication that the pure electronic term  
 153 gives positive elastoresistance in  $\text{WTe}_2$ .

## 154 8. Theoretical modeling and analysis

155 To interpret the magneto-elastoresistance (MER) measurements we employ an effective low-energy three-band model. This  
 156 simplified model can account for the salient features of the ER and the MER, in particular the non-monotonic behavior of ER  
 157 in zero magnetic field and the increase and rapid saturation of MER as a function of magnetic field. We note that we calculate  
 158 the elastoresistivity contribution to the elastoresistance, which is given by the first term in Eq. (1), and not the subleading  
 159 geometric contribution. Our effective model uses as input the strain-induced changes in the electronic band structure, which  
 160 we infer from experiment and DFT calculations.

161 The minimal electronic model consists of one hole and one electron band that cross the Fermi energy  $E_F$  at  $T = 0$  as well  
 162 as another hole band slightly below  $E_F$  (see Fig. 4a). This captures the essence of the band structure of WTe<sub>2</sub> observed by  
 163 ARPES (6, 19, 20) and first-principle calculations (21) (see also Fig. 3a and Fig. S7) with two pairs of (almost degenerate)  
 164 electron and two pairs of (almost degenerate) hole bands, and an additional hole band around the  $\Gamma$  point with a flat dispersion  
 165 (see Fig. S9). Using ARPES, the flat hole pocket was shown to be about 65 meV below  $E_F$  (19), which is in good agreement  
 166 with our DFT calculations, where the heavy-hole pocket appears about 72 meV below  $E_F$ . As shown in Fig. S9, there are  
 167 additional electron pockets slightly above the Fermi energy that we do not include in our effective three-band model. Taking  
 168 them into account does not change our main qualitative conclusions.

169 The three bands we consider can be characterized by effective masses  $m_\alpha^*$  with  $\alpha = e, lh, hh$  corresponding to electron ( $e$ ),  
 170 light-hole ( $lh$ ) and heavy-hole ( $hh$ ) pockets. We can approximate the effective masses of these bands using SdH oscillation  
 171 analysis and DFT calculations, neglecting small anisotropies in momentum space. As shown in Table S1, the DFT predicts  
 172 a ratio of  $m_{e,\text{DFT}}^*/m_{lh,\text{DFT}}^* \approx 1/2$ . For simplicity and because the precise value does not affect our main conclusions, we set  
 173 this ratio to unity in our model calculation below:  $m_e^*/m_{lh}^* \approx 1$ . This is also in agreement with our SdH oscillation analysis  
 174 (see Fig. 3). It is difficult to extract a precise value for  $m_{hh}^*$  from DFT as the band curvature changes relatively quickly as  
 175 a function of momentum away from the  $\Gamma$  point. We thus set the ratio of  $m_{hh}^*/m_e^* = 4.6$  in our low energy model, which  
 176 qualitatively captures the flatness of the hole band at  $E = -72$  meV at the  $\Gamma$  point observed in DFT (see Fig. S9). Again, the  
 177 precise value does not affect our main conclusions. Let us emphasize that at  $T = 0$ , results of our simplified model calculation  
 178 presented below agree with a more detailed DFT transport calculation (see Fig. S8) that takes anisotropies in momentum  
 179 space properly into account.

180 Application of uniaxial stress leads to a modification of the bandstructure. At  $T = 0$ , we can capture this change using DFT  
 181 calculations, as presented in Fig. S9. Before describing the results, let us emphasize that the numerical DFT results depend on  
 182 the degree to which correlations are taken into account, and have thus a rather significant degree of variance. In addition, at  
 183 finite temperatures, other effects such as thermal expansion (under strain) may also play a role. As a result, we use the DFT  
 184 results as an overall guidance to the strain induced parameter changes in our effective model, but do not constrain ourselves to  
 185 the exact numerical values predicted by DFT.

186 At  $T = 0$ , the changes to the DFT bandstructure induced by compressive strain ( $\epsilon_{xx} = -0.2\%$ ) can to a good approximation  
 187 be captured by a shift of the bottom (top) of the electron (hole) band and a change of the curvature around the band minima  
 188 (maxima), corresponding to a change of the carrier's effective masses  $m_\alpha^*$ . As shown in Table S1, the two (degenerate) electron  
 189 bands (labelled 3 and 4) are shifting down in energy by about  $\Delta E_{3,4} = -3$  meV (for  $\epsilon_{xx} = -0.2\%$ ), while the two (almost  
 190 degenerate) hole bands (labelled 1 and 2) shift up by about  $\Delta E_1 = 4$  meV and  $\Delta E_2 = 6$  meV. Importantly, the heavy-hole  
 191 band at the  $\Gamma$  point is shifting up by a much larger amount  $\Delta E_{hh} = 22$  meV. In our effective three-band model, we take this  
 192 observation as a qualitative input, but quantitatively differ from the DFT values in Fig. 4 by a factor of five in  $\Delta E_{hh}/\Delta E_e$ .

193 The effective masses are also modified by the presence of uniaxial stress. From quantum oscillations we infer that all masses  
 194 increase under compressive strain with slightly different but comparable rates (see Fig. 3(f)). In contrast, within DFT  $m_{lh}^*$   
 195 slightly increase and  $m_e^*$  slightly decrease (see Table S1). In our model calculation below, we describe a physical mechanism  
 196 that can explain the non-monotonic behavior of ER from a strain induced change of the carrier density alone. The discrepancy  
 197 between the change of  $m_\alpha^*$  within DFT and quantum oscillation therefore does not affect our main qualitative conclusions,  
 198 but certainly adds quantitatively to the ER in our experiment. As the masses increase under compressive strain, this adds a  
 199 negative contribution to the ER (see Eq. (12) below).

**A. Elastoresistivity in zero magnetic field.** Let us first discuss the case of zero magnetic field  $\mathbf{B} = 0$ . Using a semiclassical  
 Drude-Boltzmann approach and within the quadratic band approximation, one arrives at the well-known Drude formula for the  
 conductivity  $\sigma_\alpha = n_\alpha e^2 / (\Gamma_\alpha m_\alpha^*)$ , where  $n_\alpha$  is the carrier density and  $\Gamma_\alpha$  is the scattering rate of band  $\alpha$ . Contributions from  
 different bands add in parallel  $\sigma = \sum_\alpha \sigma_\alpha$  and the total resistivity is given by  $\rho = \sigma^{-1}$ . The elastoresistivity is now governed  
 by a sum of different contributions

$$\frac{1}{\rho(0)} \frac{d\rho(0)}{d\epsilon_{xx}} = \sum_\alpha \frac{\sigma_\alpha(0)}{\sigma(0)} \left[ \frac{\zeta_m^{(\alpha)}}{m_\alpha^*} + \frac{\zeta_\Gamma^{(\alpha)}}{\Gamma_\alpha} - \frac{\zeta_n^{(\alpha)}}{n_\alpha} \right] = \sum_\alpha \frac{\sigma_\alpha(0)}{\sigma(0)} \left[ -\frac{\zeta_\mu^{(\alpha)}}{\mu_\alpha} - \frac{\zeta_n^{(\alpha)}}{n_\alpha} \right], \quad [12]$$

200 where  $\rho(0) \equiv \rho(\mathbf{B} = 0)$ ,  $\sigma(0) \equiv \sigma(\mathbf{B} = 0)$  and we have introduced the strain derivatives  $\zeta_m^{(\alpha)} = \frac{dm_\alpha^*}{d\epsilon_{xx}}$ ,  $\zeta_\Gamma^{(\alpha)} = \frac{d\Gamma_\alpha}{d\epsilon_{xx}}$  and  
 201  $\zeta_n^{(\alpha)} = \frac{dn_\alpha}{d\epsilon_{xx}}$ . We also used that the mobility of band  $\alpha$  reads  $\mu_\alpha = e/(m_\alpha^* \Gamma_\alpha)$ . Increasing  $m_\alpha^*$  and  $\Gamma_\alpha$  increases the mobility  $\mu_\alpha$   
 202 and the resistivity  $\rho$ . On the other hand, increasing the carrier density  $n_\alpha$  reduces  $\rho$ . Contributions from different bands are  
 203 weighted according to their contribution to the total conductivity.

To make progress and estimate  $d\Gamma_\alpha/d\varepsilon_{xx}$ , we will use the scattering rates derived within Boltzmann theory and relate  $d\Gamma_\alpha/d\varepsilon_{xx}$  to changes in the density of states and the phonon properties. The scattering rate consists of a temperature  $T$ -independent impurity part and a  $T$ -dependent phonon part due to scattering off (mainly acoustic) phonons. One finds (22)

$$\frac{1}{\Gamma_{\text{imp}}^{(\alpha)}} \frac{d\Gamma_{\text{imp}}^{(\alpha)}}{d\varepsilon_{xx}} = \frac{\zeta_m^{(\alpha)}}{m_\alpha^*} + \frac{1}{3} \frac{\zeta_n^{(\alpha)}}{n_\alpha} \quad [13]$$

$$\frac{1}{\Gamma_{\text{ph}}^{(\alpha)}} \frac{d\Gamma_{\text{ph}}^{(\alpha)}}{d\varepsilon_{xx}} = -\frac{\zeta_m^{(\alpha)}}{m_\alpha^*} - 4 \frac{\zeta_c}{c_s}, \quad [14]$$

where  $\zeta_c = \frac{dc_s}{d\varepsilon_{xx}}$  is the strain induced change of the phonon velocity. More generally, strain may affect  $\Gamma_{\text{ph}}^{(\alpha)}$  in a more complicated way, for example, by modifications of the phonon polarization. Under compressive strain, one generally expects that the acoustic phonon velocity increases (hardening) such that  $\zeta_c < 0$ , due to a change of the Young modulus under strain. As this is a higher order effect in the strain, we expect it to be subleading compared to the change of the carrier densities  $\zeta_n^{(\alpha)}$  and the effective masses  $\zeta_m^{(\alpha)}$ . In Eqs. (13) and (14) we have assumed parabolic and isotropic bands. A more realistic estimate of the strain induced change, in particular of the electron-phonon scattering rate, requires detailed modeling beyond our current work. One can therefore consider  $\frac{d\Gamma_{\text{ph}}^{(\alpha)}}{d\varepsilon_{xx}}$  as a phenomenological parameter of our theory. Using the Matthiessen rule, the total scattering rate is given by  $\Gamma_\alpha = \Gamma_{\text{imp}}^{(\alpha)} + \Gamma_{\text{ph}}^{(\alpha)}$ , which yields the elastoresistivity in zero field as

$$\frac{1}{\rho(0)} \frac{d\rho(0)}{d\varepsilon_{xx}} = \sum_\alpha \frac{\sigma_\alpha(0)}{\sigma(0)} \left[ \frac{\zeta_m^{(\alpha)}}{m_\alpha^*} \left( 1 + \frac{\Gamma_{\text{imp}}^{(\alpha)} - \Gamma_{\text{ph}}^{(\alpha)}}{\Gamma_\alpha} \right) + \frac{\zeta_n^{(\alpha)}}{n_\alpha} \left( \frac{1}{3} \frac{\Gamma_{\text{imp}}^{(\alpha)}}{\Gamma_\alpha} - 1 \right) - 4 \frac{\zeta_c}{c_s} \frac{\Gamma_{\text{ph}}^{(\alpha)}}{\Gamma_\alpha} \right]. \quad [15]$$

**A.1. Low-temperature elastoresistivity.** At low temperatures phonon scattering is negligible,  $\Gamma_{\text{ph}}^{(\alpha)} \ll \Gamma_{\text{imp}}^{(\alpha)}$ , and the elastoresistivity is determined solely by electronic terms and bands that cross the Fermi energy. The behavior of the hole pocket below  $E_F$  is thus not relevant to the strain response at low temperature, assuming it is not lifted above  $E_F$ . Equation (15) therefore simplifies at low  $T$  to

$$\frac{1}{\rho(0)} \frac{d\rho(0)}{d\varepsilon_{xx}} = 2 \sum_\alpha \frac{\sigma_\alpha}{\sigma} \left( \frac{\zeta_m^{(\alpha)}}{m_\alpha^*} - \frac{1}{3} \frac{\zeta_n^{(\alpha)}}{n_\alpha} \right) \quad [16]$$

204 From the analysis of the quantum oscillations, we find that both strain derivatives have the same sign  $\zeta_m^{(\alpha)}, \zeta_n^{(\alpha)} < 0$  such  
 205 that the two effects compete with each other. Which of the two dominates depends on microscopic details. In Fig. 1c, we  
 206 find that the sign of the elastoresistance in the low temperature regime is different for different samples, while the magnitude  
 207 rapidly decreases at low  $T$  (see Fig. 1). We can understand the increase of the carrier density ( $\zeta_n^{(\alpha)} < 0$ ) within our effective  
 208 three-band model description by noticing that both DFT and SdH oscillation analysis yield that the hole bands are pulled  
 209 up in energy by strain, while the electron band is lowered. As we do not find additional SdH frequencies under strain, the  
 210 heavy hole band remains below  $E_F$  even for finite strain. As a result of the band shifts, some electrons are being redistributed  
 211 from the light hole to the electron band, which increases the total number of carriers  $n = n_e + n_h$ . Note that the difference of  
 212 electrons and holes  $\Delta n = n_e - n_h$  remains fixed. As described in detail below in Sec. A.3, we thus find a positive contribution  
 213 to the elastoresistivity from  $\zeta_n$  within our model (see Fig. 4d at low temperatures).

214 From the data in Fig. 3e and f, we find that  $\zeta_n^{(\alpha)}$  and  $\zeta_m^{(\alpha)}$  are of the same order of magnitude. It is therefore difficult to  
 215 estimate which dominates and unambiguously predict the sign. In fact, from a quantitative analysis of our SdH results we  
 216 estimate that the strain-induced enhancement of the mass slightly dominates, which yields  $\frac{1}{\rho(0)} \frac{d\rho(0)}{d\varepsilon_{xx}} < 0$ . One should keep in  
 217 mind, however, that quantum oscillations measure the cyclotron mass, which is a property of an extremal orbit, and not the  
 218 effective mass  $1/m_i^* = \frac{\partial^2 E_{\mathbf{k}}}{\partial k_i \partial k_i}$  (or rather the velocity  $v_i = \frac{\partial E_{\mathbf{k}}}{\partial k_i}$ ) in the current direction  $i$  (averaged over the Fermi surface),  
 219 which is the quantity relevant for transport (22). In fact, a more detailed microscopic DFT transport calculation predicts a  
 220 positive slope for  $\rho/\tau$ , where  $1/\tau = \Gamma$ , in agreement with experiment. The DFT analysis, however, neglects strain-induced  
 221 changes in the scattering time  $\tau$ .

222 **A.2. Intermediate temperature elastoresistivity.** At higher temperatures, one must take into account not only the strain-induced  
 223 modifications of the bandstructure right at the chemical potential  $\mu(T)$ , but also further away from it within a range of  $k_B T$ .  
 224 Strain also affects the carriers in thermally (de)populated bands. This is the dominant effect in semiconductors, where strain  
 225 leads to a redistribution of carriers among valleys with different effective masses, leading to a characteristic  $1/T$  behavior of the  
 226 elastoresistance (23). We indeed find such a  $1/T$  dependence of the elastoresistance at high temperatures  $T \gtrsim 250$  K. However,  
 227 in WTe<sub>2</sub> the behavior is much richer due to the presence of both electron and hole carriers.

228 The observed increase of the resistivity under compressive strain  $\frac{1}{\rho(0)} \frac{d\rho(0)}{d\varepsilon_{xx}} < 0$  at intermediate and high  $T$  in Fig. 1c,  
 229 corresponds to  $\zeta_n^{(\alpha)} > 0$ , i.e., a decrease in the carrier density under compressive strain. As shown in Fig. 4 and explained in  
 230 detail in the next section A.3 our three-band model calculation reproduces such a behavior (at intermediate temperatures)  
 231 using the rigid band energy shift trends under strain obtained from DFT as input (see Fig. 3a and Fig. 4c). The non-monotonic  
 232 behavior of the elastoresistivity as a function of temperature arises within our model from the fact that the heavy-hole

233 pocket contributes to transport only at finite  $T$ , where it is partially filled. Within DFT, strain lifts this pocket up in energy  
 234 by an amount  $\Delta E_{hh}$  that is about two times larger than the shifts  $\Delta E_{lh}$  and  $\Delta E_e$  found for the other two pockets. As a  
 235 result, the dominant effect is a redistribution of holes from the light to the heavy hole pocket, resulting in an increase of  $\rho$  at  
 236 intermediate temperatures. The decrease of the number of light holes under strain occurs above a characteristic temperature  
 237  $k_B T \approx |\mu - E_{hh}(\varepsilon_{xx})|$  (see inset of Fig. 4c), which depends on the shift  $\Delta E_{hh} = E_{hh}(\varepsilon_{xx} = -0.2\%) - E_{hh}(\varepsilon_{xx} = 0)$  and the  
 238 initial distance of the band edge to the chemical potential  $\mu$ :  $|\mu - E_{hh}(\varepsilon_{xx} = 0)|$ . We note that the effective mass enhancement  
 239 observed within quantum oscillations, corresponding to  $\zeta_m^{(\alpha)} < 0$ , adds with the same sign to the  $\zeta_n^{(\alpha)}$  term, making the  
 240 elastoresistance more negative.

241 **A.3. Details about the low-energy model calculations.** Let us now describe in detail the calculation performed within the effective  
 242 low-energy three-band model that yields the results in Fig. 4. We consider the bandstructure shown in Fig. 4(a), which  
 243 describes three parabolic bands with energies  $E_\alpha(\mathbf{k}) = \pm \mathbf{k}^2 / (2m_\alpha^*) - E_\alpha^{\min}$ . Here, the + sign is chosen for the electron band  
 244  $\alpha = e$  and the - is chosen for the two hole bands  $\alpha = lh, hh$ . Using input from DFT, we choose the following numerical values  
 245 for the effective masses  $m_e^* = m_{lh}^* = 0.22m_{hh}^*$  and band energy minima  $E_{lh}^{\min} = E_{hh}^{\min} = 0$  and  $E_e^{\min} = 0.5$  in the absence of  
 246 strain. The bands are assumed to have a bandwidth of  $W_{lh} = W_e = 1$  and  $W_{hh} = 0.5$ . We note that this corresponds to the  
 247 top of the hole bands being located at  $E_{lh}^{\max} = E_{lh}^{\min} + W_{lh} = 1$  and  $E_{hh}^{\max} = E_{hh}^{\min} + W_{hh} = 0.5$ . These values for the band  
 248 edges and widths leads for the appropriate electron filling to a Fermi surface topology that agrees with the one found within  
 249 DFT and ARPES. Since the almost perfect compensation of carriers does not play a role in the effect we describe, we do not  
 250 fine tune the parameters to be in that regime. Note that we set  $m_e^*/m_{lh}^* = 1$  for simplicity, which agrees well with our SdH  
 251 oscillation analysis but deviates from the value of 1/2 found within DFT.

The density of states for the respective bands in three-dimensions reads

$$g_{lh}(E) = \frac{\sqrt{2}(m_{lh}^*)^{3/2}}{\pi^2} \sqrt{W_{lh} - E} \quad [17]$$

$$g_e(E) = \frac{\sqrt{2}(m_e^*)^{3/2}}{\pi^2} \sqrt{E - E_e^{\min}} \quad [18]$$

$$g_{hh}(E) = \frac{\sqrt{2}(m_{hh}^*)^{3/2}}{\pi^2} \sqrt{W_{hh} + E_{hh}^{\min} - E} \quad [19]$$

252 with energies  $E_\alpha^{\min} \leq E \leq E_\alpha^{\min} + W_\alpha$ . We choose a total electronic filling fraction of  $n_{el} = 0.77$ , which corresponds to a  
 253 chemical potential at zero temperature of  $\mu(T = 0) = 0.56 W_{lh}$ , shown as the dashed vertical line in Fig. 4(b). This is chosen  
 254 to result in a Fermi surface topology consistent DFT and ARPES. As noted above, the almost perfect compensation of the  
 255 number of electrons and holes is not important in our model to reproduce the experimental behavior and we therefore do not  
 256 fine tune the parameters to correspond to this regime. Note that the heavy-hole band lies below the chemical potential, so the  
 257  $T = 0$  Fermi surface consists of one hole and one electron pocket. The chemical potential increases as a function of temperature  
 258 and reaches a value of  $\mu(T = 0.1W_{lh}) = 0.63 W_{lh}$ . Here and in the following we express all energies in units of the light-hole  
 259 bandwidth  $W_{lh}$ .

260 The application of strain is modelled as rigid band shifts

$$E_\alpha^{\min}(\varepsilon_{xx}) = E_\alpha^{\min}(\varepsilon_{xx} = 0) + \Delta E_\alpha(\varepsilon_{xx}). \quad [20]$$

262 Drawing upon our DFT results, we assume that the electron band is lowered in energy, while the two hole bands shift up. As  
 263 only relative energy shifts matter, we measure energy shifts with respect to the light-hole band, and use the following parameters  
 264  $\Delta E_{lh} = 0$ ,  $\Delta E_e = -4 \times 10^{-3} W_{lh}$  and  $\Delta E_{hh} = 4 \times 10^{-2} W_{lh}$  for a particular strain value  $\varepsilon_{xx}$ . By assuming that these rigid band  
 265 shifts are caused by the experimental strain value of  $\varepsilon_{xx} = -0.2\%$  and by comparison to DFT, we can express the light-hole  
 266 bandwidth energy scale in eV as  $W_{lh} \simeq 0.4$  eV. This follows from our findings in DFT that  $\Delta E_{hh}(\varepsilon_{xx} = -0.2\%) \approx 16$  meV, ,  
 267 relative to the shift of the light-hole pocket, (see Fig. S9) and thus  $W_{lh} = 16 \text{ meV} / 0.04 = 0.4$  eV. Room temperature thus  
 268 roughly corresponds to  $300 \text{ K} \simeq 0.06 W_{lh}$ . We note that the ratio of the band shifts  $\Delta E_{hh} / \Delta E_e$  we use are about five times  
 269 larger than the DFT prediction. Importantly, the qualitative outcomes of our calculation are robust to choosing smaller shift  
 270 values. In particular, the non-monotonic behavior of ER also occurs for shifts that are equal to the DFT predictions, as long  
 271 as the final position of the  $hh$  band is within a range of  $k_B T$  of the chemical potential  $\mu(T)$ . In this case, however, the ER  
 272 may not experience a sign change that could be attributed to the  $\zeta_n$  contribution alone, as the ER value at  $T = 0$  is too large.  
 273 In order to reproduce the sign change of ER for these smaller shifts, we would have to invoke contributions arising from the  
 274 strain-induced change of effective masses  $\zeta_m$ , which we find to be negative from experiment at low temperatures.

We now demonstrate that one can obtain a non-monotonic behavior of ER as a function of  $T$  from the temperature  
 dependence of the strain induced change of the carrier density  $\zeta_n(T)$  in Eq. (12) alone. The elastoresistivity  $\frac{1}{\rho(0)} \frac{d\rho(0)}{d\varepsilon_{xx}}$  is  
 calculated starting from Eq. (12). Focusing on the  $\zeta_n$  term, we first need to calculate the number of carriers in the respective  
 bands  $n_\alpha$  as a function of temperature  $T$ :

$$n_{\alpha \in \{lh, hh\}}(T) = \int_0^{W_\alpha + E_\alpha^{\min}} dE g_\alpha(E) [1 - n_F(E, T, \mu)] \quad [21]$$

$$n_e(T) = \int_0^{W_e + E_e^{\min}} dE g_e(E) n_F(E, T, \mu). \quad [22]$$

275 Here,  $n_F$  is the Fermi function. The results for the carrier densities  $n_\alpha(T)$  as a function of temperature with and without  
 276 strain are shown in Fig. 4(c). The contribution of the change of carrier densities to the elastoresistivity for a given value of  
 277  $\Delta\varepsilon_{xx}$  is then given by (see Eq. (12))

$$278 \quad \left. \frac{1}{\rho} \frac{\Delta\rho}{\Delta\varepsilon_{xx}} \right|_{\zeta_n} = - \sum_{\alpha} \frac{\sigma_{\alpha}}{\sigma} \frac{\frac{\Delta n_{\alpha}}{\Delta\varepsilon_{xx}}}{n_{\alpha}} = - \sum_{\alpha} \frac{\frac{\Delta n_{\alpha}}{\Delta\varepsilon_{xx}}}{n_{\alpha} + \frac{\Gamma_{\alpha}}{\Gamma_{\beta}} \frac{m_{\alpha}^*}{m_{\beta}^*} n_{\beta} + \frac{\Gamma_{\alpha}}{\Gamma_{\gamma}} \frac{m_{\alpha}^*}{m_{\gamma}^*} n_{\gamma}} \quad [23]$$

279 with  $\Delta n_{\alpha} = n_{\alpha}(\varepsilon_{xx} \neq 0) - n_{\alpha}(0)$  and  $\alpha \neq \beta \neq \gamma$ . For simplicity, we use  $\Gamma_{\alpha}/\Gamma_{\beta} = m_{\alpha}^*/m_{\beta}^*$ , which holds if impurity scattering  
 280 is dominant (22) and approximates the ratio of Fermi velocities by  $v_F^{(\alpha)}/v_F^{(\beta)} \approx m_{\beta}^*/m_{\alpha}^*$ . Using the carrier densities  $n_{\alpha}(T)$  and  
 281 the change in the carrier densities  $\Delta n_{\alpha}(T)$  due to strain  $\varepsilon_{xx}$  shown in Fig. 4(c), we obtain  $\left. \frac{1}{\rho} \frac{\Delta\rho}{\Delta\varepsilon_{xx}} \right|_{\zeta_n}$  shown in Fig. 4(d). We  
 282 emphasize again that we use  $\Delta\varepsilon_{xx} = -0.2\%$  in the calculation.

283 Let us now turn to the results of our model calculations. At  $T = 0$ , we observe that  $n_{hh} = 0$  both with and without  
 284 strain, because the  $hh$  band remains below  $E_F$ . Electrons solely move from the  $lh$  to the  $e$  band, resulting in an increase of  
 285 both electron and hole carrier densities  $\Delta n_e > 0$  and  $\Delta n_{lh} > 0$ . Note that  $n_{\alpha}$  refers to the number of carriers in band  $\alpha$ ,  
 286 which corresponds to electrons for  $\alpha = e$  and to holes for  $\alpha = lh, hh$ . Due to the increase in carrier density, the resistivity is  
 287 decreasing under the rigid band shift we consider. As this is caused by compressive strain  $\varepsilon_{xx} < 0$ , the ER, which is a slope,  
 288 is therefore positive. This description remains valid at low temperatures as long as  $k_B T < |\mu - E_{hh}(\varepsilon_{xx})|$ , where  $\mu$  is the  
 289 chemical potential.

290 As the temperature increases beyond that value, the behavior of ER changes as the  $hh$  band energy  $E_{hh}$  is shifted to within  
 291 a range of  $k_B T$  of the chemical potential:  $k_B T \approx |E_{hh}(\varepsilon_{xx}) - \mu|$ . This occurs at a characteristic temperature  $T_{hh} \approx 0.01 W_{lh}$   
 292 for the parameters we have chosen (see inset of Fig. 4(c)). Above this temperature, we find that the  $hh$  band is populated by  
 293 holes in the presence of strain  $n_{hh}(\varepsilon_{xx} = -0.2\%, T > T_{hh}) > 0$ . As the  $hh$  band is flat and its density of states is much larger  
 294 than the one of the  $lh$  band,  $g_{hh} > g_{lh}$ , holes will move from the  $lh$  to the  $hh$  band and  $\Delta n_{lh} < 0$  for  $T > T_{hh}$  (see inset of  
 295 Fig. 4(c)). As a result the ER will decrease and eventually change sign. This occurs because in the expression for the ER  
 296 in Eq. (23) the change of carrier density  $\Delta n_{\alpha}$  is weighted by the individual conductivity of the carrier type  $\sigma_{\alpha}$  (see middle  
 297 equation). Due to the large effective mass of the  $hh$  carriers,  $\sigma_{hh}$  is small and even though  $n_{hh}$  increases due to strain, the effect  
 298 on the resistivity is small. Instead, the dominant effect on the resistivity is that  $\Delta n_{lh} < 0$ , which results in a decrease of ER.  
 299 This effect competes with the increase of  $\Delta n_e > 0$ , which occurs due to the lowering of the  $e$  band by strain and the resulting  
 300 flow of electrons from the  $lh$  to the  $e$  band. This increase of  $e$  carriers continues to contribute positively to ER, but as shown  
 301 in Fig. 4(d) this contribution is smaller than the negative one arising from  $\Delta n_{lh} < 0$  as long  $|\sigma_{lh} \Delta n_{lh} / n_{lh}| > |\sigma_e \Delta n_e / n_e|$ .  
 302 Importantly, we associate this non-monotonic behavior of  $\Delta n_{lh}(T)$  as a function of  $T$  as the main origin of the non-monotonic  
 303 behavior of ER that we observe experimentally. Finally, let us emphasize that our model calculations yield a non-monotonic  
 304 behavior of ER within the range  $0 < T/W_{lh} < 0.06$  (see Fig. 4(d)), which corresponds to the range between  $T = 0$  and room  
 305 temperature  $T \approx 300$  K. This agrees with the temperature range, where this phenomenon is observed experimentally.

306 **B. Elastoresistance in finite magnetic field.** Let us now turn to the analysis of the magneto-elastoresistance (MER), i.e., the  
 307 elastoresistance in finite magnetic field:

$$308 \quad \text{MER}(T, B) \equiv \frac{1}{R(T, B, \varepsilon_{xx} = 0)} \left. \frac{d[\Delta R(T, B, \varepsilon_{xx})]}{d\varepsilon_{xx}} \right|_{\varepsilon_{xx}=0}, \quad [24]$$

309 where  $\Delta R = R(\varepsilon_{xx}) - R(\varepsilon_{xx} = 0)$ . Experimentally, as shown in Fig. 2, we observe a rich behavior that can be described as  
 310 follows: at high temperatures, where the magnetoresistance (MR) vanishes, the magneto-elastoresistance (MER) follows the  
 311 zero-field elastoresistance (ER). At lower  $T$ , when the (non-saturating) MR first becomes finite and then exceptionally large, we  
 312 find an increase of the MER proportional to  $B^2$  (at small  $B$  fields). At temperatures  $T \lesssim 50$  K, the observed increase of MER  
 313 as a function of  $B$  crosses over into saturation at a positive plateau value. The saturation value of MER and the saturation field  
 314 strength  $B_1$  both increase as the temperature is lowered. As we show below, the saturation field scale  $B_1$  can be associated  
 315 with the coefficient of the quadratic B-field dependence of the non-saturating MR, and our findings of  $B_1$  are in agreement with  
 316 previous MR measurements. At the lowest temperatures  $T < 10$  K, where MR exhibits SdH oscillations, the MER exhibits a  
 317 delicate and strong dependence on the magnetic field, ranging from  $\text{MER}(T_0, B) = +120$  to  $\text{MER}(T_0, B') = -80$  in the field  
 318 range of less than one Tesla:  $|B - B'| \approx 0.5$  T (see Fig. 2).

319 **B.1. MER in quantum regime at low temperatures.** The interesting behavior of MER quantum oscillations in the quantum regime can  
 320 be straightforwardly understood from the strain-induced change of the SdH oscillation frequencies that we have experimentally  
 321 observed. It occurs due to change in size of the extremal orbits (see Sec. 4 in the SI for more details). We find that the orbits  
 322 increase under compressive strain, which is in agreement with predictions of the three-band model using  $\Delta E_{\alpha}$  from DFT as  
 323 input. Increasing orbits correspond to an increase of carrier densities at low temperatures. At fixed temperature and field, strain  
 324 can move the minima and maxima of the oscillating resistance such that a position close to the maximum of a SdH oscillation  
 325 in zero strain becomes a position close to a minimum. This results in a large change of the resistance (see Fig S3). The reverse  
 326 situation can occur at nearby  $B$ -field values, which explains the sign change of  $\Delta R_{\varepsilon_{xx}, B}$  when  $B$  is tuned over a small range.



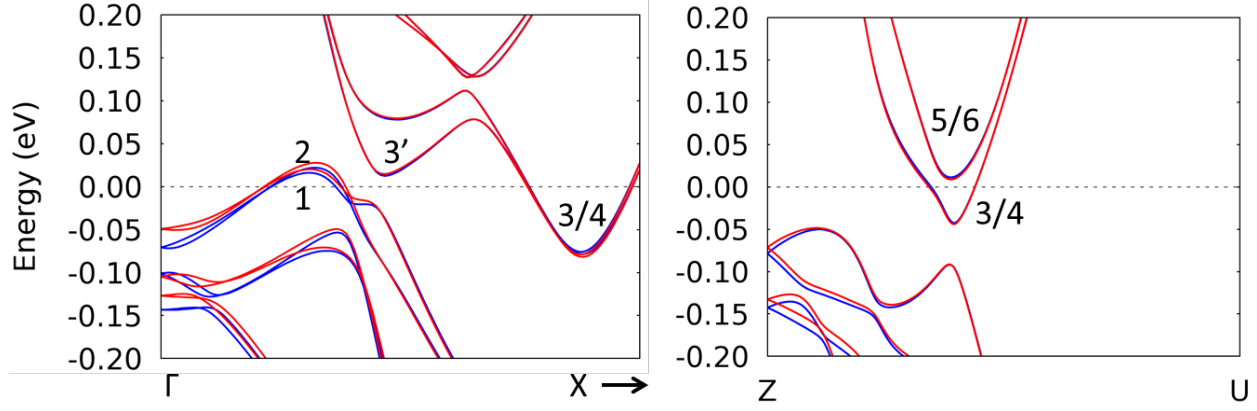

**Fig. S9. DFT calculation of band structures** DFT band structure for strain ( $\epsilon_{xx}$ ) at 0 (blue line) and -0.2% (red line) along  $\Gamma$ -X and Z-U. Band 1 and 2 are the hole bands and band 3 and 4 are the electron bands in Fig. 3. Another set of electron bands (5 and 6) along Z-U are also close to Fermi level. The label  $i/j$  means the  $i$  and  $j$  overlap with each other and have the same dispersion in the specific pocket region. The label  $i'$  means the second pocket region is also of interest because it is near the Fermi level.

**Table S1. DFT results of curvature and edge for each band in the pocket regions fitted to parabolics (see numeric label in Fig. S9). The curvature of band 1, 2 and 3/4 along  $\Gamma - X$  are the inverse of effective mass for lh and e. In the low-energy model, we set these two effective masses to be approximately equal for simplify.**

| Curvature ( eV $\text{\AA}^2$ ) | 1     | 2     | 3'    | 3/4    | 5/6   |
|---------------------------------|-------|-------|-------|--------|-------|
| $\epsilon_{xx} = 0.0\%$         | -18.4 | -19.2 | 26.6  | 35.8   | 15.1  |
| $\epsilon_{xx} = -0.2\%$        | -16.9 | -18.2 | 28.1  | 37.1   | 15.4  |
| Edge ( eV )                     | 1     | 2     | 3'    | 3/4    | 5/6   |
| $\epsilon_{xx} = 0.0\%$         | 0.028 | 0.033 | 0.024 | -0.068 | 0.012 |
| $\epsilon_{xx} = -0.2\%$        | 0.032 | 0.039 | 0.026 | -0.071 | 0.010 |

**B.2. MER in semiclassical regime at intermediate temperatures.** We will now show that the observations in the intermediate temperature regime  $10 \text{ K} < T < 200 \text{ K}$  can be qualitatively captured within a semiclassical two-band model description (25) of electron and hole carriers, where the resistivity takes the well-known form

$$\rho(B) = \rho(0) \frac{1 + e\rho(0)(n_e\mu_h + n_h\mu_e)\mu_e\mu_h B^2}{1 + [e\rho(0)\mu_e\mu_h(n_e - n_h)B]^2} = \rho(0) \frac{1 + (B/B_1)^2}{1 + (B/B_{\text{sat}})^2}. \quad [25]$$

As above, the zero field resistivity is given by  $\rho(0) \equiv \rho(B=0) = (\sum_{\alpha} \sigma_{\alpha})^{-1}$  with conductivities  $\sigma_{\alpha} = en_{\alpha}\mu_{\alpha}$ . The mobilities read  $\mu_{\alpha} = e/(m_{\alpha}^* \Gamma_{\alpha})$  and we have defined the characteristic magnetic field strengths

$$B_1 = [e\rho(0)(n_e\mu_h + n_h\mu_e)\mu_e\mu_h]^{-1/2} \quad [26]$$

$$B_{\text{sat}} = (e\rho(0)\mu_e\mu_h|n_e - n_h|)^{-1}. \quad [27]$$

327 It was shown in previous studies that the carrier compensation in  $\text{WTe}_2$  is almost perfect and  $\Delta n = n_e - n_h$  is very small (26).  
 328 As a result, MR exhibits purely quadratic dependence on magnetic field with no signs of saturation. The magnetic field range  
 329 we consider  $B < 14 \text{ T}$  therefore lies in the “intermediate” field regime with  $B_1(T) < B < B_{\text{sat}}(T)$ .

Starting from Eq. (25) the difference between the elasto-resistance at finite and zero magnetic field can be calculated to

$$\Delta \text{MER} \equiv \frac{1}{\rho(B)} \frac{d\rho(B)}{d\epsilon_{xx}} - \frac{1}{\rho(0)} \frac{d\rho(0)}{d\epsilon_{xx}} = -\frac{2(B/B_1)^2}{1 + (B/B_1)^2} \frac{1}{B_1} \frac{dB_1}{d\epsilon_{xx}} + \frac{2(B/B_{\text{sat}})^2}{1 + (B/B_{\text{sat}})^2} \frac{1}{B_{\text{sat}}} \frac{dB_{\text{sat}}}{d\epsilon_{xx}}. \quad [28]$$

330 For small magnetic fields,  $\Delta \text{MER}$  varies quadratically with field and reaches a (first) saturation plateau when  $B \gtrsim B_1$ . The  
 331 sign of the quadratic dependence and of the saturation plateau depend on the strain derivative of  $B_1$ . Experimentally, we  
 332 observe an increase of  $\Delta \text{MER}$  with field and a positive saturation value, corresponding to  $dB_1/d\epsilon_{xx} > 0$ . At higher fields,  
 333  $B \approx B_{\text{sat}}$ ,  $\Delta \text{MER}$  is predicted to vary quadratically with field again, until it finally reaches a (second) saturation plateau when  
 334  $B \gg B_{\text{sat}}$ . Since  $B_{\text{sat}}$  in  $\text{WTe}_2$  is larger than the field strengths that we consider, this regime is inaccessible in our experiment,  
 335 and we only observe the initial increase and the first saturation plateau.

To relate the strain derivative of the two characteristic field strengths  $dB_1/d\epsilon_{xx}$  and  $dB_{\text{sat}}/d\epsilon_{xx}$  to microscopic parameters,

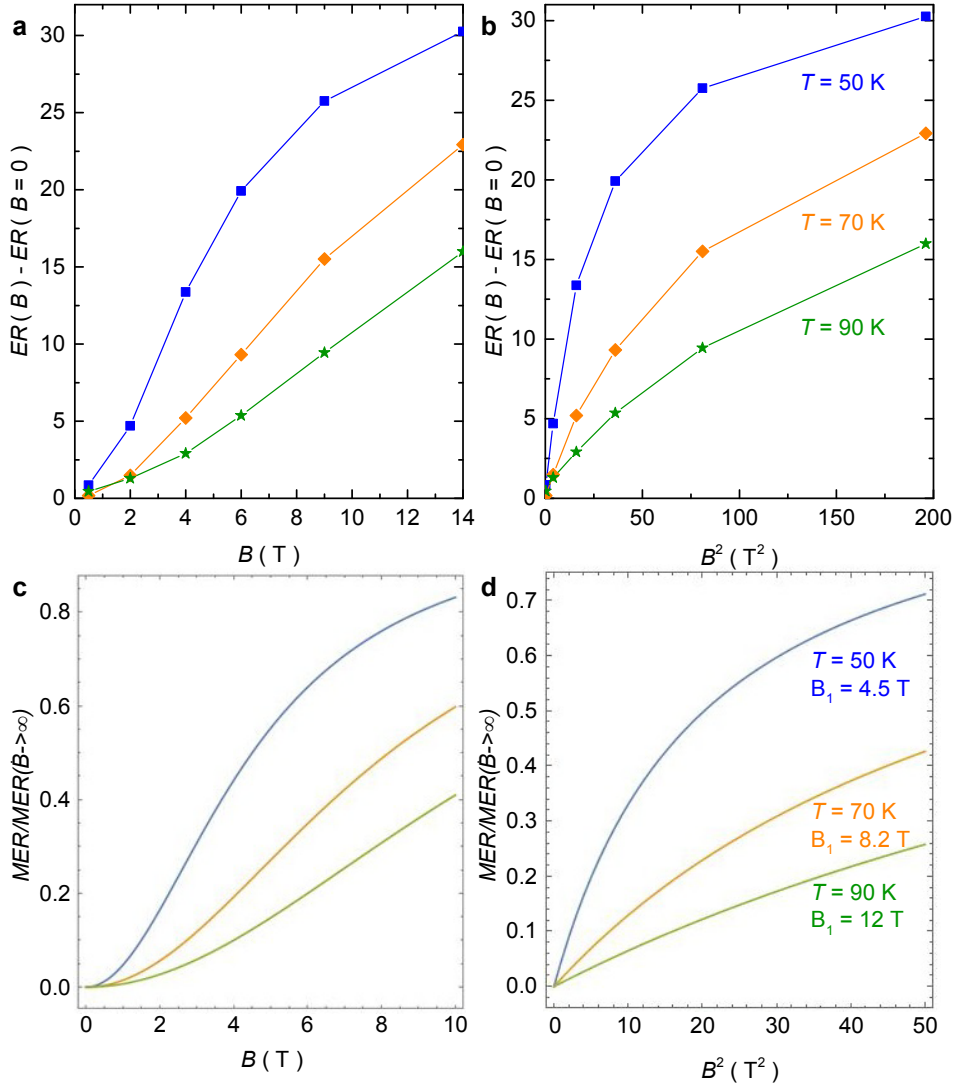

**Fig. S10.  $\Delta$ MER data and simulation** **a**, the magnetic field ( $B$ ) dependence data of  $\Delta$ MER  $\equiv$   $ER(B) - ER(0)$  at 50 K (blue), 70 K (orange) and 90 K (green); **b**, the same data as in panel (a) plotted versus  $B^2$  on  $x$ -axis; **c**, model prediction for  $\Delta$ MER using (first term of) Eq. (28). Curves are normalized to their saturation value and value for  $B_1(T)$  is extracted from MR data of Ref. (24). Different curves correspond to temperatures of 50 K (blue), 70 K (orange) and 90 K (green); **d** results of panel (c) plotted versus  $B^2$  on  $x$ -axis.

we take derivatives of Eqs. (26) and (27) and obtain in the general case

$$\frac{1}{B_1} \frac{dB_1}{d\varepsilon_{xx}} = -\frac{1}{2\rho(0)} \frac{d\rho(0)}{d\varepsilon_{xx}} - \frac{1}{2} B_1^2 e \rho(0) \mu_e \mu_h \left[ \left( \frac{\zeta_n^{(e)}}{n_e} + \frac{\zeta_\mu^{(e)}}{\mu_e} + 2 \frac{\zeta_\mu^{(h)}}{\mu_h} \right) n_e n_h + \left( \frac{\zeta_n^{(h)}}{n_h} + \frac{\zeta_\mu^{(h)}}{\mu_h} + 2 \frac{\zeta_\mu^{(e)}}{\mu_e} \right) n_h \mu_e \right] \quad [29]$$

$$\frac{1}{B_{\text{sat}}} \frac{dB_{\text{sat}}}{d\varepsilon_{xx}} = -\frac{1}{\rho(0)} \frac{d\rho(0)}{d\varepsilon_{xx}} - \sum_{\alpha} \frac{\zeta_{\mu}^{(\alpha)}}{\mu_{\alpha}} = \sum_{\alpha} \left[ \frac{\sigma_{\alpha}(0)}{\sigma(0)} \frac{\zeta_n^{(\alpha)}}{n_{\alpha}} - \frac{\sigma_{\bar{\alpha}}(0)}{\sigma(0)} \frac{\zeta_{\mu}^{(\alpha)}}{\mu_{\alpha}} \right], \quad [30]$$

where  $\bar{\alpha} = e(h)$  for  $\alpha = h(e)$ . While this general expression for  $dB_1/d\varepsilon_{xx}$  in Eq. (29) is complicated, it simplifies considerably under the assumption that electron and hole mobilities are equal  $\mu_e \approx \mu_h \equiv \mu$ . This assumption is approximately satisfied in WTe<sub>2</sub> (27). Approximating  $\mu_e \approx \mu_h \equiv \mu$ , one finds

$$\frac{1}{B_1} \frac{dB_1}{d\varepsilon_{xx}} = -\frac{\zeta_{\mu}}{\mu}. \quad [31]$$

An important consequence of this result is that  $\Delta$ MER directly probes the strain-induced change of the mobility

$$\Delta\text{MER} = \frac{2\zeta_{\mu}}{\mu} \frac{(B/B_1)^2}{1 + (B/B_1)^2} \xrightarrow{B \gg B_1} \frac{2\zeta_{\mu}}{\mu} \quad [32]$$

for  $B \ll B_{\text{sat}}$ . The saturation value of  $\Delta$ MER is a direct measurement of  $\zeta_{\mu}/\mu$  under the assumption  $\mu_e \approx \mu_h \equiv \mu$ . We find that this saturation value is positive for all temperatures, but decreases as temperature is increased. This is in qualitative

agreement with an analysis that relies on the previous expressions for  $d\Gamma_{\text{imp}}^{(\alpha)}/d\varepsilon_{xx}$  and  $d\Gamma_{\text{ph}}^{(\alpha)}/d\varepsilon_{xx}$  in Eqs. (13) and (14) using input from DFT and quantum oscillations that  $\zeta_m^{(\alpha)}, \zeta_n^{(\alpha)} < 0$  at low temperatures. We can thus understand the decrease of the saturation value as coming from the increasing importance of phonon scattering, which adds a negative contribution to  $\zeta_\mu/\mu$  from the term increase of the phonon velocity under strain  $\zeta_c/c_s < 0$ .

It is worth emphasizing that the saturation plateau of the MER measures a different combination of strain derivatives as the zero field ER (see Eq. (12)). In particular, it does not explicitly depend on the change of carrier density  $\zeta^{(\alpha)}/n_\alpha$ . Combining measurements in zero and finite magnetic field thus allows us to gain more insight into the electronic response of the material under strain. Let us discuss one particular example. We find that the saturation value of MER at large fields  $B \gg B_1$  is positive for all  $T$ , while ER changes sign as a function of  $T$ . This contrasting behavior can be traced back to a non-monotonic behavior of the strain-induced change of the carrier densities  $\zeta_n^{(\alpha)}$  as a function of  $T$  as opposed to  $\zeta_m^{(\alpha)}, \zeta_\Gamma^{(\alpha)}$ , or  $\zeta_\mu^{(\alpha)}$ . This follows from the fact that the derivative  $\zeta_n^{(\alpha)}$  explicitly only occurs on ER, but not in the saturation value of MER, which measures  $\zeta_\mu^{(\alpha)}$ .

Finally, we note that at even larger field strengths of  $B \gg B_{\text{sat}}$  beyond the regime studied here, the semiclassical analysis predicts that  $\Delta\text{MER}$  reaches another saturation plateau whose value depends on yet another combination of strain derivatives (see Eq. (30))

$$\lim_{B \gg B_{\text{sat}}} \Delta\text{MER} = 2 \sum_{\alpha} \left[ \frac{\sigma_{\alpha}(0)}{\sigma(0)} \frac{\zeta_n^{(\alpha)}}{n_{\alpha}} - \frac{\sigma_{\bar{\alpha}}(0)}{\sigma(0)} \frac{\zeta_{\mu}^{(\alpha)}}{\mu_{\alpha}} \right], \quad [33]$$

where  $\bar{\alpha} = e(h)$  for  $\alpha = h(e)$ . Interestingly, the strain derivative of the carrier density  $\zeta_n^{(\alpha)}$  now occurs with the opposite sign than at zero field, predicting a sign change if this is the dominant effect, as we believe to be the case in  $\text{WTe}_2$ . Note that in deriving Eq. (33) we have used that the compensation level  $\Delta n$  cannot be tuned by strain due to charge conservation, as long as the quadratic band approximation is valid.

## References

1. HH Kuo, MC Shapiro, SC Riggs, IR Fisher, Measurement of the elastoresistivity coefficients of the underdoped iron arsenide  $\text{Ba}(\text{Fe}_{0.975}\text{Co}_{0.025})_2\text{As}_2$ . *Phys. Rev. B* **88**, 085113 (2013).
2. RE Newnham, *Properties of materials: anisotropy, symmetry, structure*. (Oxford University Press on Demand), (2005).
3. JM Gere, *Mechanics of Materials, ; Brooks*. (Cole, Pacific Grove, CA), (2004).
4. F Zeng, WB Zhang, BY Tang, Electronic structures and elastic properties of monolayer and bilayer transition metal dichalcogenides  $\text{MX}_2$  ( $M = \text{Mo}, \text{W}; X = \text{O}, \text{S}, \text{Se}, \text{Te}$ ): A comparative first-principles study. *Chin. Phys B* **24**, 097103 (2015).
5. J Lee, et al., Single- and few-layer  $\text{WTe}_2$  and their suspended nanostructures: Raman signatures and nanomechanical resonances. *Nanoscale* **8**, 7854–7860 (2016).
6. Y Wu, et al., Temperature-induced Lifshitz transition in  $\text{WTe}_2$ . *Phys. Rev. Lett.* **115**, 166602 (2015).
7. DO Brodsky, et al., Strain and vector magnetic field tuning of the anomalous phase in  $\text{Sr}_3\text{Ru}_2\text{O}_7$ . *Sci. Adv.* **3** (2017).
8. CW Hicks, ME Barber, SD Edkins, DO Brodsky, AP Mackenzie, Piezoelectric-based apparatus for strain tuning. *Rev. Sci. Instruments* **85**, 065003 (2014).
9. P Hohenberg, W Kohn, Inhomogeneous Electron Gas. *Phys. Rev.* **136**, B864–B871 (1964).
10. W Kohn, LJ Sham, Self-Consistent Equations Including Exchange and Correlation Effects. *Phys. Rev.* **140**, A1133–A1138 (1965).
11. BJ Ceperley, D. M.; Alder, Ground-State of the Electron-Gas by a Stochastic Method. *Phys Rev Lett* **45**, 566–569 (1980).
12. A Perdew, J. P.; Zunger, Self-Interaction Correction to Density-Functional Approximations for Many-Electron Systems. *Phys Rev B* **23**, 5048–5079 (1981).
13. A Mar, S Jovic, JA Ibers, Metal-metal vs tellurium-tellurium bonding in  $\text{WTe}_2$  and its ternary variants  $\text{TaIrTe}_4$  and  $\text{NbIrTe}_4$ . *J. Am. Chem. Soc.* **114**, 8963–8971 (1992).
14. SR Rourke, P. M. C.; Julian, Numerical extraction of de Haas-van Alphen frequencies from calculated band energies. *Comput. Phys. Commun.* **183**, 324–332 (2012).
15. GK Madsen, DJ Singh, BoltzTraP. A code for calculating band-structure dependent quantities. *Comput. Phys. Commun.* **175**, 67 – 71 (2006).
16. G Kresse, J Furthmüller, Efficient iterative schemes for ab initio total-energy calculations using a plane-wave basis set. *Phys. Rev. B* **54**, 11169–11186 (1996).
17. PE Blöchl, Projector augmented-wave method. *Phys. Rev. B* **50**, 17953–17979 (1994).
18. HJ Monkhorst, JD Pack, Special points for Brillouin-zone integrations. *Phys. Rev. B* **13**, 5188–5192 (1976).
19. I Pletikosić, MN Ali, AV Fedorov, RJ Cava, T Valla, Electronic Structure Basis for the Extraordinary Magnetoresistance in  $\text{WTe}_2$ . *Phys. Rev. Lett.* **113**, 216601 (2014).
20. Y Wu, et al., Three-dimensionality of the bulk electronic structure in  $\text{WTe}_2$ . *Phys. Rev. B* **95**, 195138 (2017).
21. D Di Sante, et al., Three-Dimensional Electronic Structure of the Type-II Weyl Semimetal  $\text{WTe}_2$ . *Phys. Rev. Lett.* **119**, 026403 (2017).
22. H Smith, HH Jensen, *Transport Phenomena*. (Oxford University Press, Oxford, U.K.), (1989).
23. Y Kanda, Y Kanda, A graphical representation of the piezoresistance coefficients in silicon. *IEEE Transactions on Electron Devices* **29**, 64–70 (1982).



- 396 24. MN Ali, et al., Large, non-saturating magnetoresistance in WTe<sub>2</sub>. *Nature* **514**, 205–208 (2014).  
397 25. A Pippard, *Magnetoresistance in Metals* eds. A Goldman, P McClintock, M Springford. (Cambridge university press),  
398 (1989).  
399 26. MN Ali, et al., Correlation of crystal quality and extreme magnetoresistance of WTe<sub>2</sub>. *EPL (Europhysics Letters)* **110**,  
400 67002 (2015).  
401 27. Y Luo, et al., Hall effect in the extremely large magnetoresistance semimetal WTe<sub>2</sub>. *Appl. Phys. Lett.* **107**, 182411 (2015).
